# Supplementary material for: A novel profiled core–shell nanofibrous membrane for wastewater treatment by direct contact membrane distillation
Source: Royal Society of Chemistry journal article supplement (doi:10.1039/c6ta05492g), 2016-01-01
Supplement: c6ta05492g1.pdf [file c6ta05492g1.pdf]

## Electronic Supplementary Information for

# A Novel Profiled Core-Shell Nanofibrous Membrane for Wastewater Treatment by Direct Contact Membrane Distillation

By Xiong Li,<sup>ab</sup> Li Deng,<sup>a</sup> Xufeng Yu,<sup>a</sup> Min Wang,<sup>a</sup> Xuefen Wang,<sup>\*a</sup> Carmen García-Payo<sup>b</sup> and Mohamed Khayet<sup>\*bc</sup>

<sup>a</sup>State Key Laboratory for Modification of Chemical Fibers and Polymer Materials, Donghua University, Shanghai, 201620, People's Republic of China

<sup>b</sup>Department of Applied Physics I, Faculty of Physics, University Complutense of Madrid, Avda. Complutense s/n 28040 Madrid, Spain

<sup>c</sup>Madrid Institute of Advances Studies of Water (IMDEA Water Institute), Calle Punto Com nº 2, 28805 Alcalá de Henares, Madrid, Spain

\*Corresponding author: [wangxf@dhu.edu.cn](mailto:wangxf@dhu.edu.cn) (X. Wang); [khayetm@fis.ucm.es](mailto:khayetm@fis.ucm.es) (M. Khayet)

## 1. Membrane Porosity

The porosity (i.e. void volume fraction) of the membrane is defined as the volume of the inter-fiber spaces divided by the total volume of the membrane, which was determined by the gravimetric method.<sup>1</sup> Isopropyl alcohol (IPA) was used as the wetting liquid which penetrated into the inter-fiber spaces of the electrospun nanofibrous membrane, the membrane weight was measured before and after saturated by IPA. The membrane void volume fraction,  $\varepsilon$ , can be calculated by the following equation:

$$\varepsilon = \frac{(w_w - w_d) / \rho_i}{(w_w - w_d) / \rho_i + w_d / \rho_p}$$

Where  $w_d$  is the weight of the dry membrane,  $w_w$  is the weight of the wet membrane,  $\rho_i$  is the isopropyl alcohol density,  $\rho_p$  is the polymer density or the calculated average density of electrospun core-shell nanofibrous membrane.

## 2. Liquid Entry Pressure of Water ( $LEP_w$ ) Measurement

$LEP_w$  (sometimes faulty called “wetting pressure”) is the pressure that must be applied onto distilled water before it penetrates into a non-wetted (dry) membrane,<sup>1</sup> i.e., water droplet cannot pass through the membrane below this breakthrough pressure. The dry electrospun nanofibrous membrane with an effective area of  $0.95\text{ cm}^2$  was placed into the measuring cell and the reservoir was filled with distilled water. By means of a gas cylinder that was filled with nitrogen, a slight pressure was raised stepwise with 0.005 bar and each pressure was maintained for 10 min in the process of the degasification of the feed side and the  $LEP_w$  test. The minimum applied pressure that resulted in a continuous flux was regarded as the  $LEP_w$  value. The measurements were carried out thrice using three different membrane samples made under the same condition. The results were averaged to obtain the final  $LEP_w$  value.

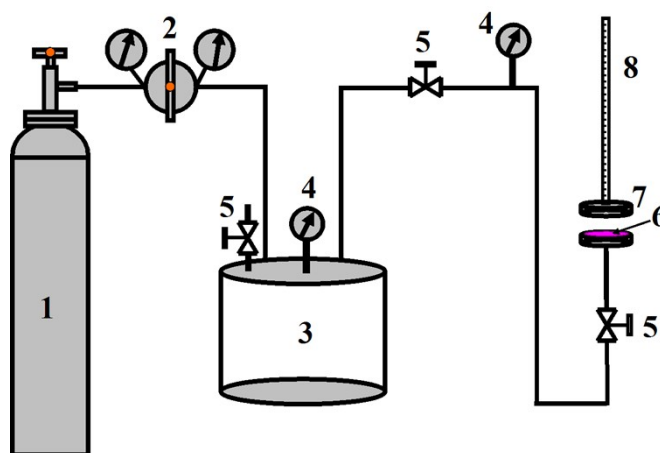

**Figure S1.** Apparatus for the determination of the  $LEP_w$ : (1) gas cylinder with nitrogen, (2) reducing valve, (3) reservoir, (4) manometer, (5) pressure regulator, (6) membrane, (7) measuring cell, and (8) measuring pipette.<sup>2</sup>

### 3. Direct Contact Membrane Distillation (DCMD) Test

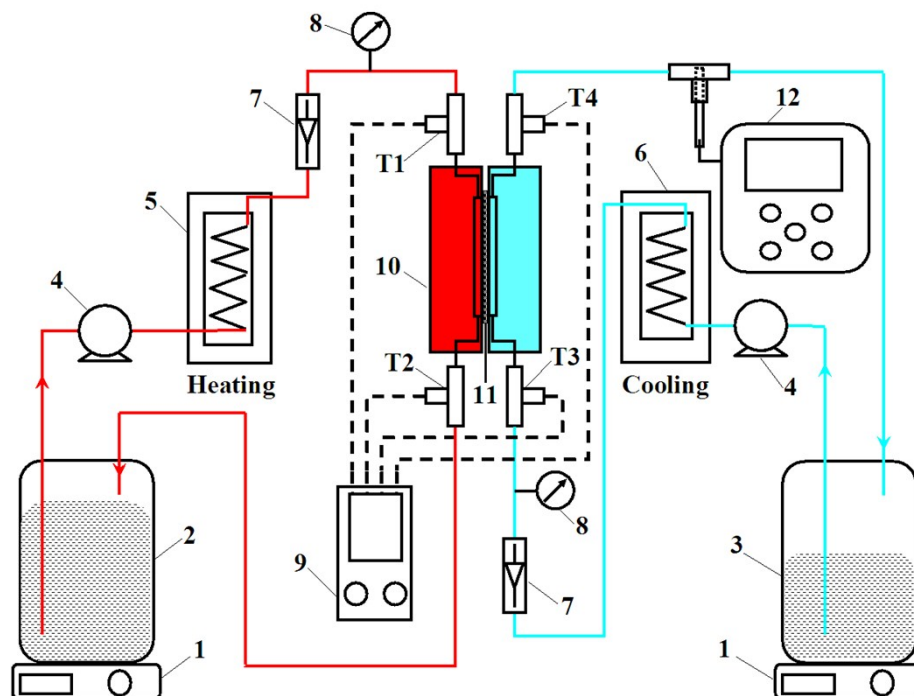

**Figure S2.** Schematic diagram of the direct contact MD setup: (1) digital balance; (2) feed solution; (3) permeate tank; (4) diaphragm laboratory pump; (5) heating system; (6) chiller; (7) flowmeter; (8) manometer; (9) thermometer; (T1~T4) temperature probe; (10) membrane cell; (11) membrane; (12) conductivity meters.<sup>2</sup>

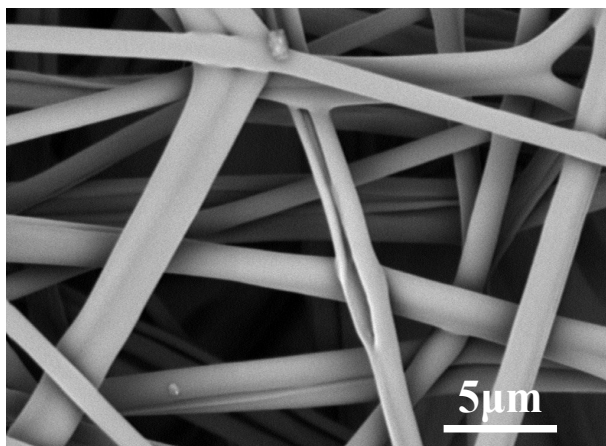

**Figure S3.** Representative FE-SEM image of electropun profiled PAN-PS-3 nanofiber prepared applying an electric voltage of 18 kV.

## Notes and references

- (1) Smolders, K.; Franken, A. C. M. Terminology for Membrane Distillation. *Desalination* **1989**, 72, 249-262.
- (2) Li, X.; Wang, C.; Yang, Y.; Wang, X.; Zhu, M.; Hsiao, B. S. Dual-Biomimetic Superhydrophobic Electrospun Polystyrene Nanofibrous Membranes for Membrane Distillation. *ACS Appl. Mater. Interfaces* **2014**, 6, 2423-30.
